# Supplementary material for: Chemical Profile and Biological Effects of an Herbal Mixture for the Development of an Oil-in-Water Cream
Source: MDPI journal article supplement (doi:10.3390/plants12020248), 2023-01-05
Supplement: s1 [file s1]

# Chemical Profile and Biological Effects of an Herbal Mixture for the Development of an Oil-in-Water Cream

Diana Antonia Safta <sup>1†</sup>, Irina Ielciu <sup>2†</sup>, Raffaella Șuștic <sup>3</sup>, Daniela Hanganu <sup>4,\*</sup>, Mihaela Niculae <sup>5</sup>, Mihai Cenariu <sup>5</sup>, Eموke Pall <sup>5</sup>, Mirela Liliana Moldovan <sup>1</sup>, Marcela Achim <sup>3</sup>, Cătălina Bogdan <sup>1†</sup> and Ioan Tomuță <sup>3,†</sup>

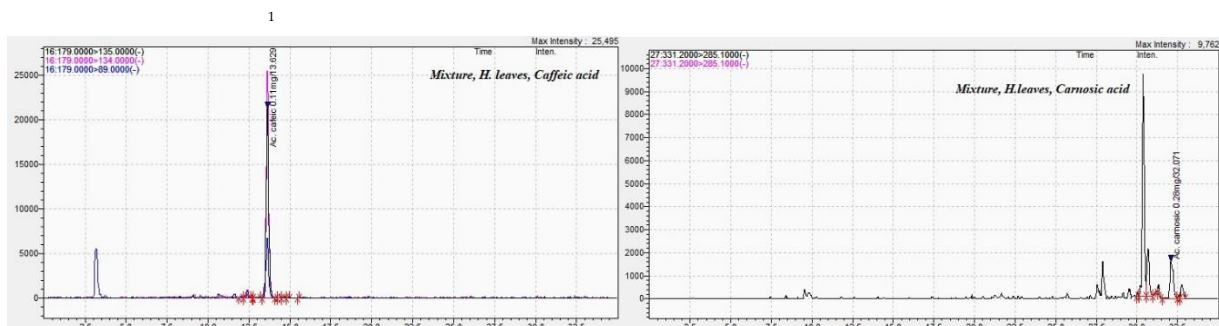

Figure S1. HPLC-MS Chromatograms of caffeic and carnosic acids from HM

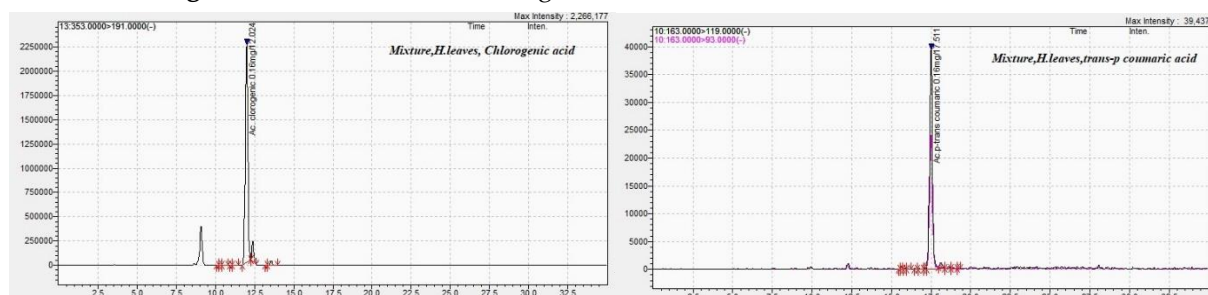

Figure S2. HPLC-MS Chromatograms of chlorogenic and p-coumaric acids from HM

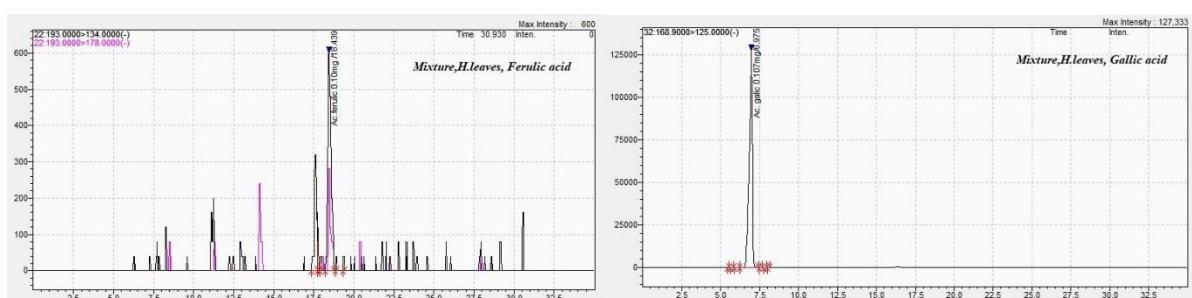

Figure S3. HPLC-MS Chromatograms of ferulic and gallic acids from HM

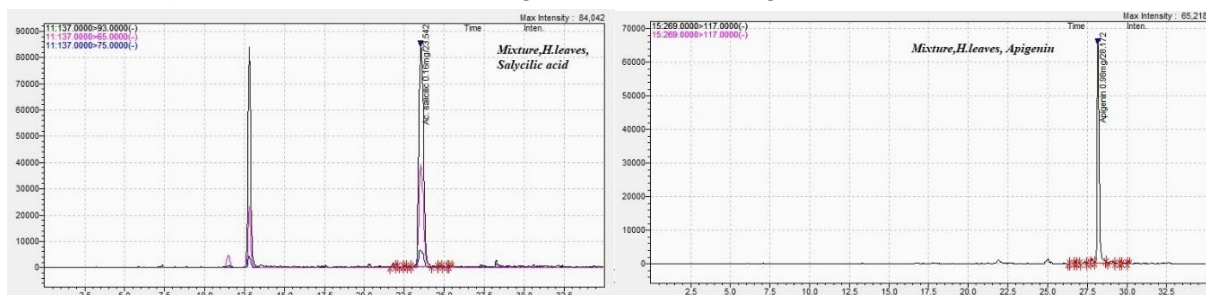

Figure S4. HPLC-MS Chromatograms of salycilic acid and apigenin from HM

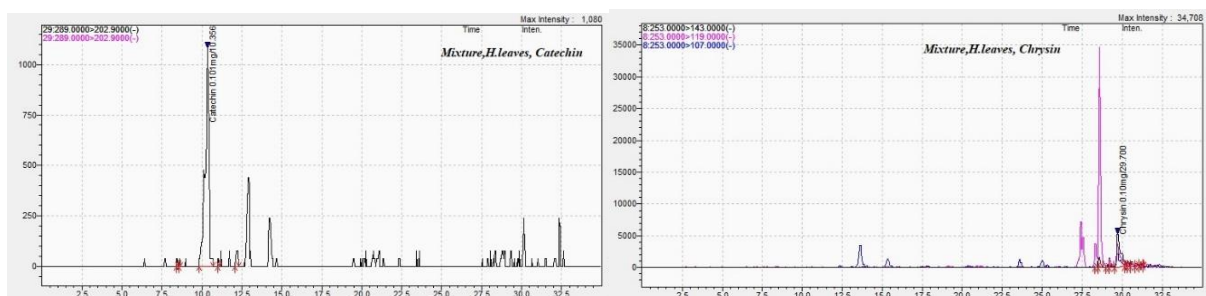

Figure S5. HPLC-MS Chromatograms of catechin and chrysin from HM

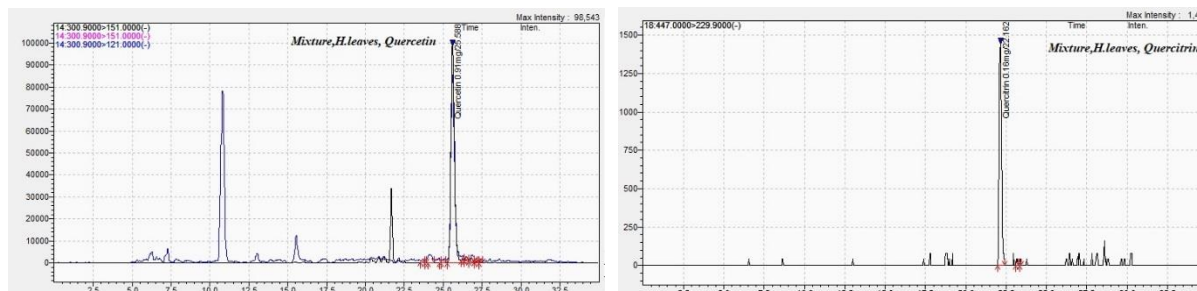

Figure S6. HPLC-MS Chromatograms of quercetin and quercitrin from HM

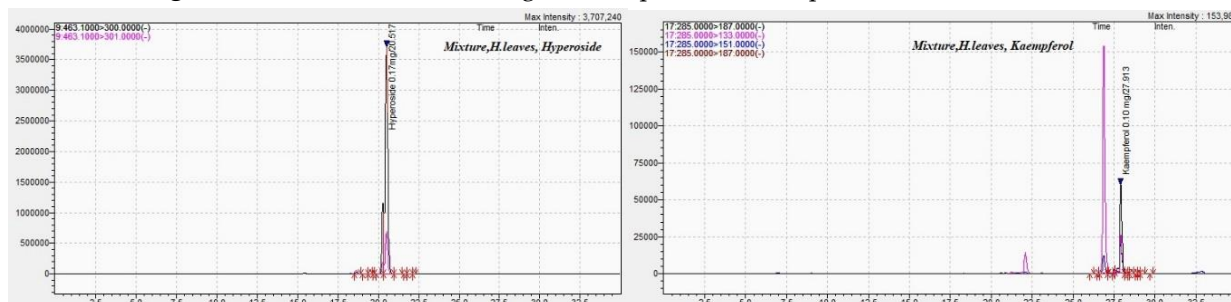

Figure S7. HPLC-MS Chromatograms of hyperoside and kaempferol from HM

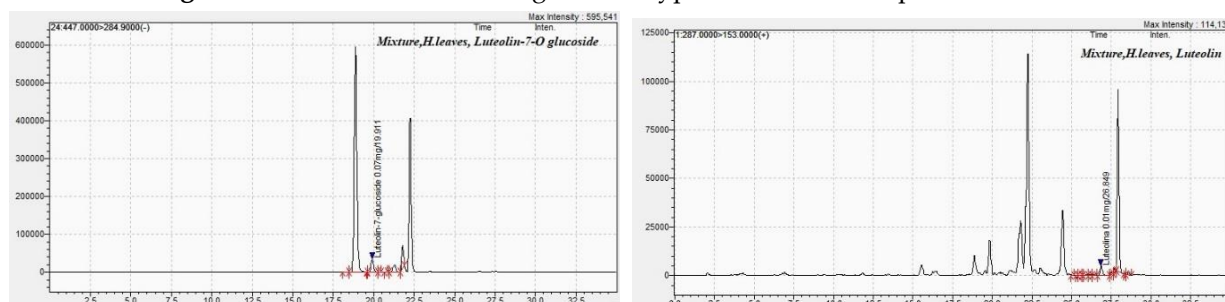

Figure S8. HPLC-MS Chromatograms of luteolin-7-O-glucoside and luteolin from HM

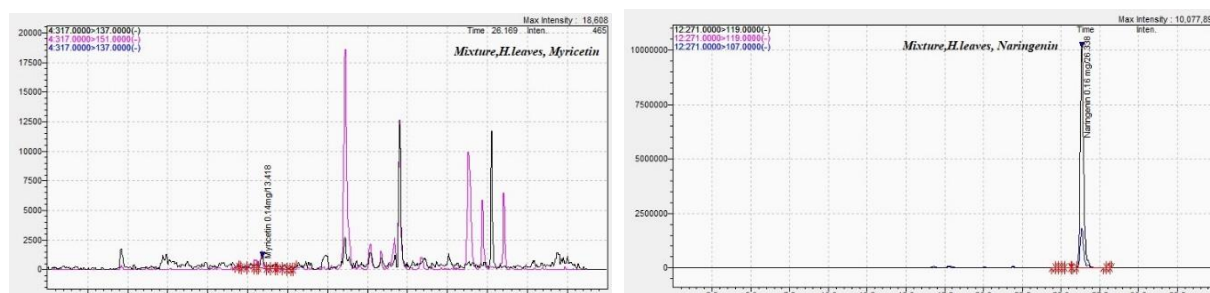

Figure S9. HPLC-MS Chromatograms of myricetin and naringenin from HM

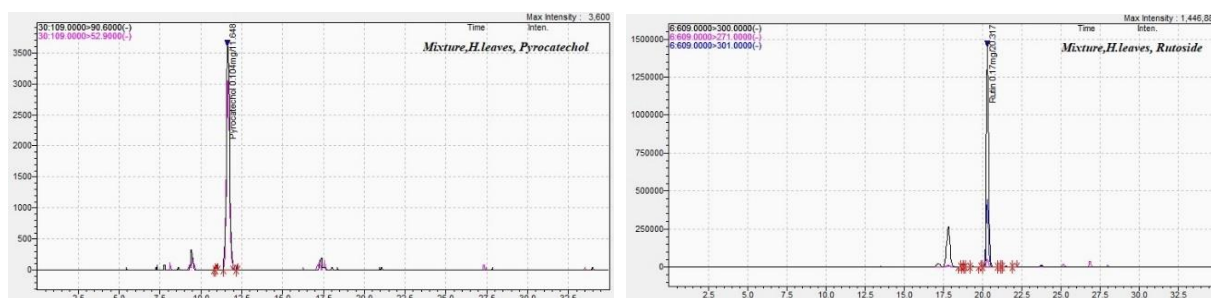

Figure S10. HPLC-MS Chromatograms of pyrocatechol and rutside from HM

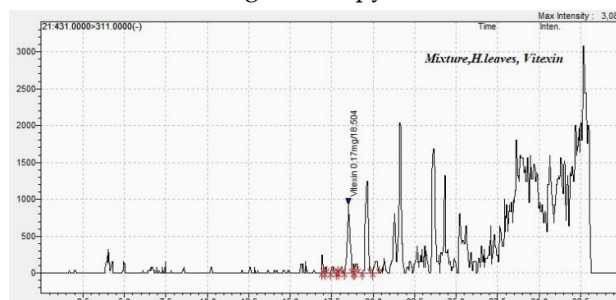

Figure S11. HPLC-MS Chromatogram of vitexin from HM

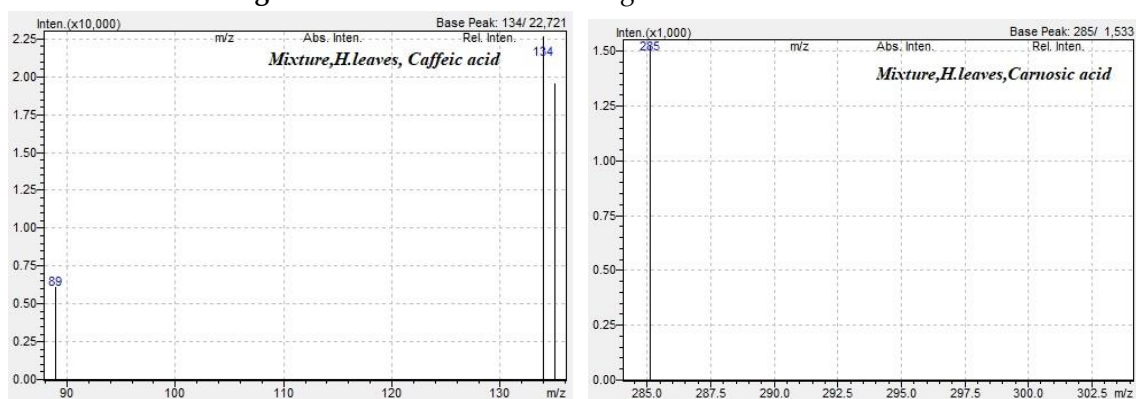

Figure S12. The mass spectra of the HPLC-MS analyzed caffeic and carnosic acids from HM

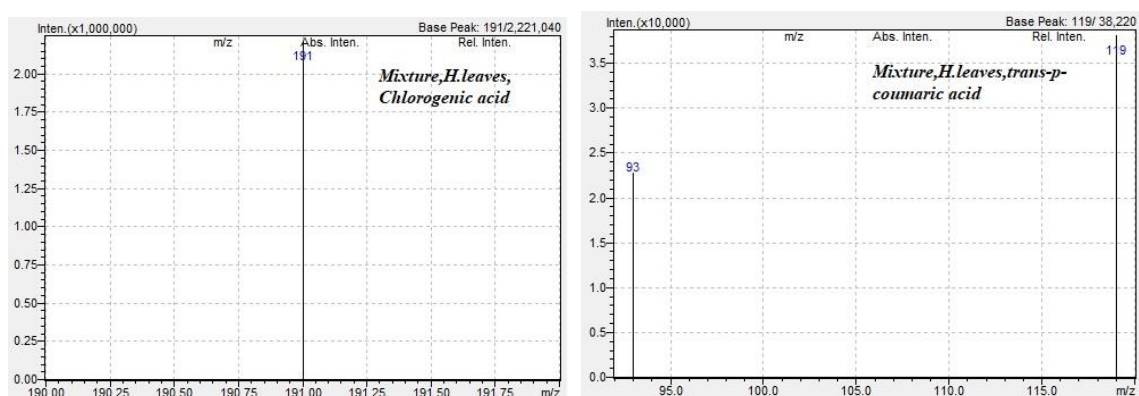

Figure S13. The mass spectra of the HPLC-MS analyzed chlorogenic and p-coumaric acids from HM



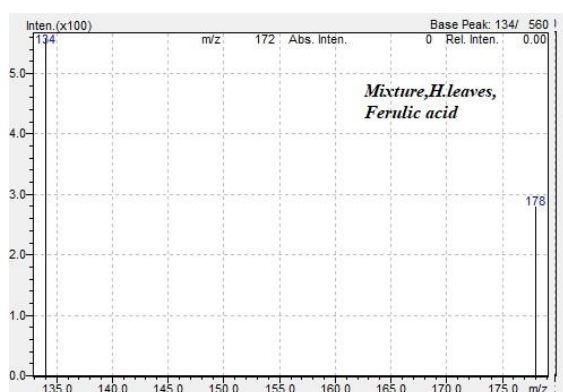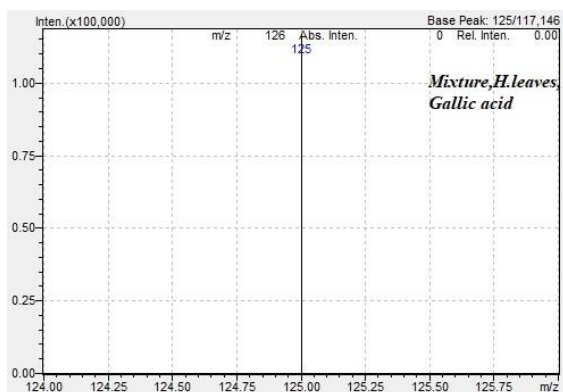

**Figure S14.** The mass spectra of the HPLC-MS analyzed ferulic and gallic acids from HM

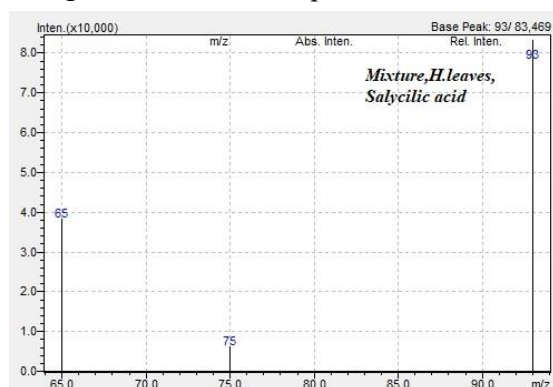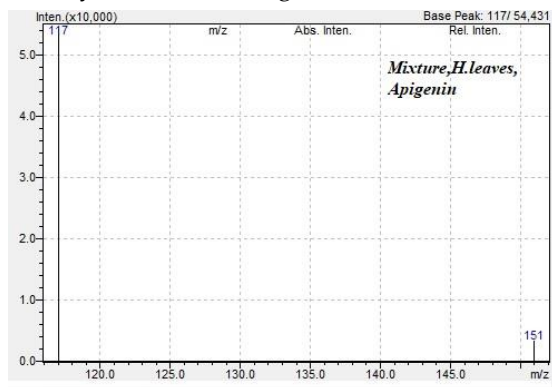

**Figure S15.** The mass spectra of the HPLC-MS analyzed salicylic acid and apigenin from HM

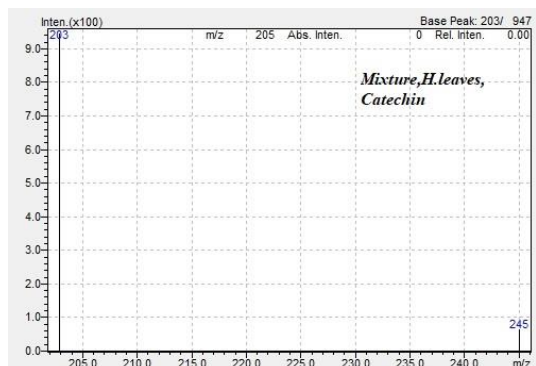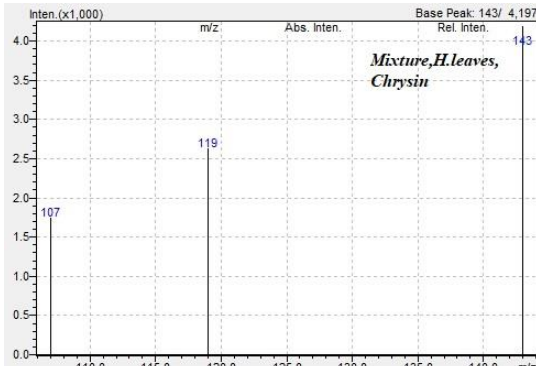

**Figure S16.** The mass spectra of the HPLC-MS analyzed catechin and chrysin from HM

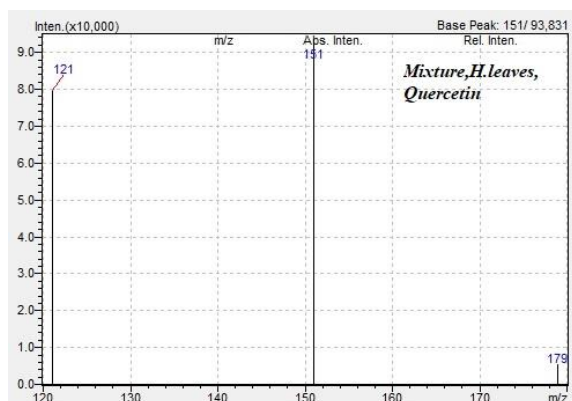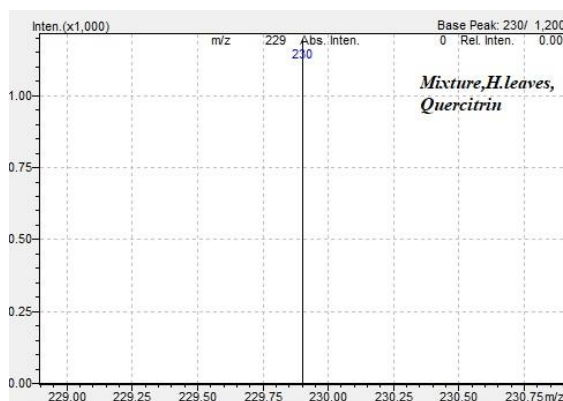

**Figure S17.** The mass spectra of the HPLC-MS analyzed quercetin and quercitrin from HM

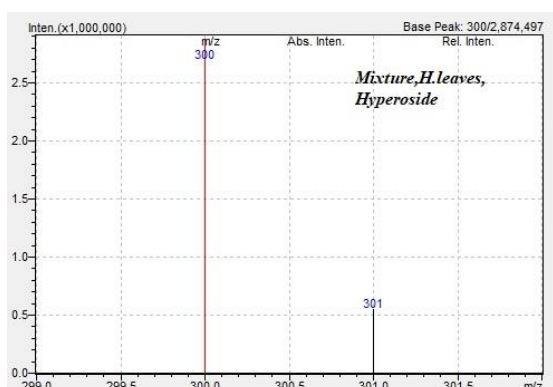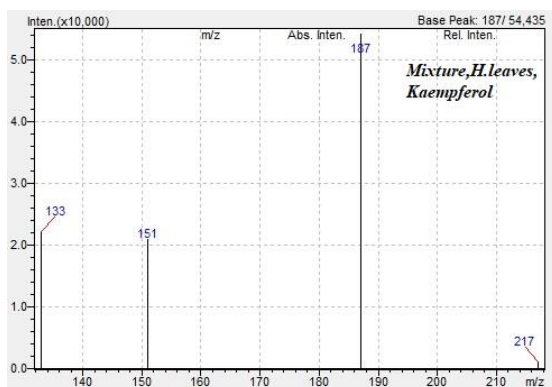

Figure S18. The mass spectra of the HPLC-MS analyzed hyperoside and kaempferol from HM

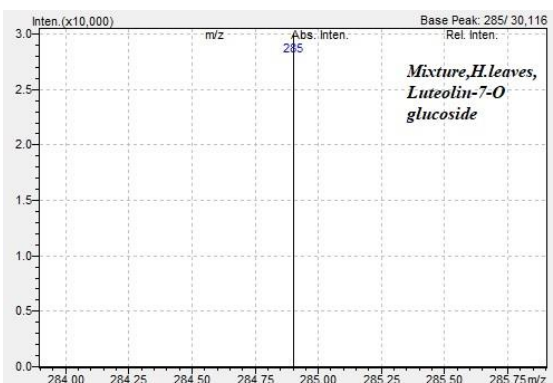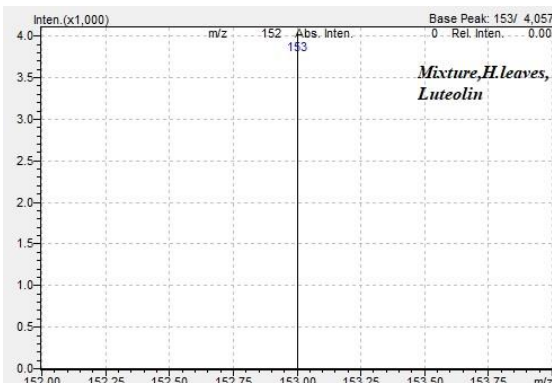

Figure S19. The mass spectra of the HPLC-MS analyzed luteolin-7-O-glucoside and luteolin from HM

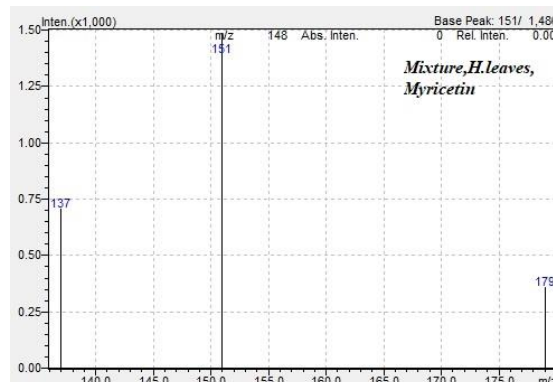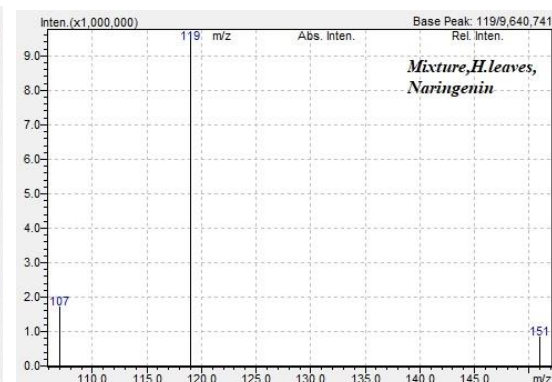

Figure S20. The mass spectra of the HPLC-MS analyzed myricetin and naringenin from HM

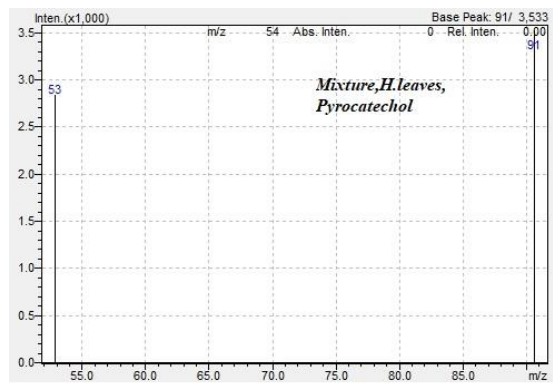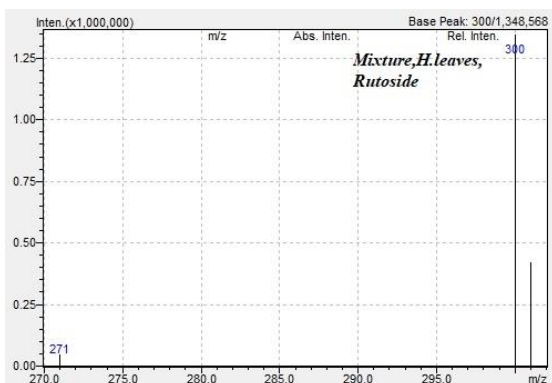

Figure S21. The mass spectra of the HPLC-MS analyzed pyrocatechol and rutoside from HM

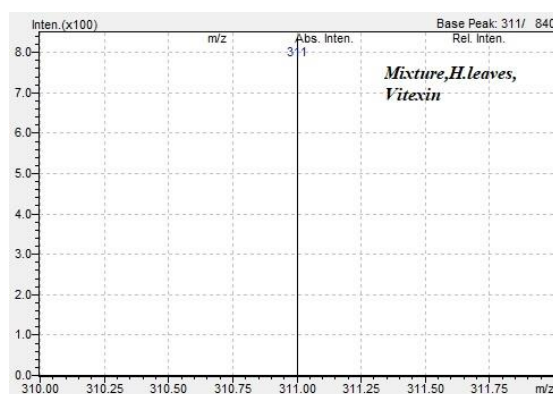

Figure S22. The mass spectra of the HPLC-MS analyzed vitexin from HM

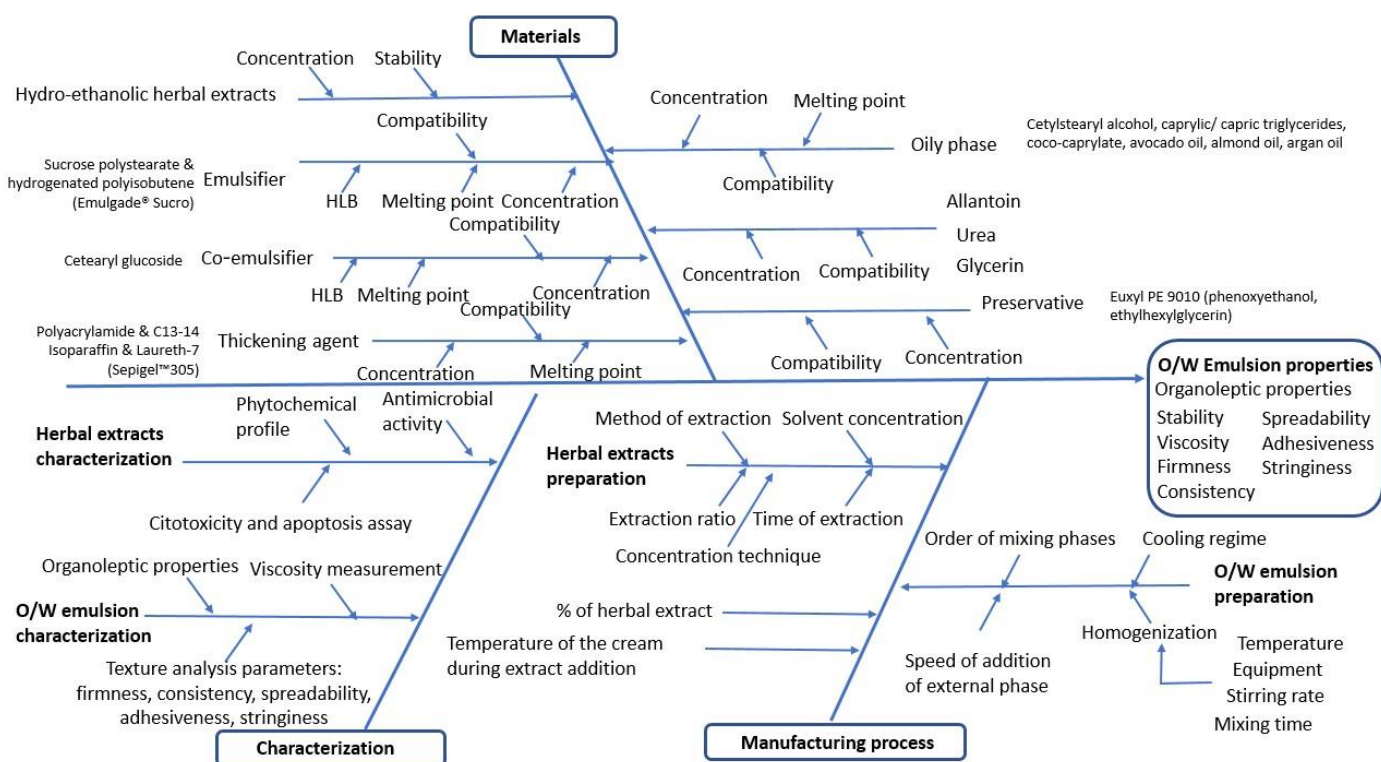

Figure S23. Ishikawa diagram

\*HLB-hydrophilic-lipophilic balance, O/W- oil-in-water

Table S1. FMEA risk assessment

|                                         | CPPss         | Potential failure mode                    | Potential failure ef-<br>fects                                          | O | S | D | RP<br>N |
|-----------------------------------------|---------------|-------------------------------------------|-------------------------------------------------------------------------|---|---|---|---------|
| Critical formulation factors            |               |                                           |                                                                         |   |   |   |         |
| Hy-<br>dro-ethanolic<br>herbal extracts | Concentration | Improper concentration                    | Efficiency                                                              | 1 | 4 | 5 | 20      |
|                                         | Stability     | Alteration of phyto-<br>compounds         | Efficiency                                                              | 3 | 3 | 5 | 45      |
|                                         | Compatibility | Incompatibility with<br>other ingredients | Stability, organoleptic<br>properties, viscosity,<br>texture parameters | 3 | 5 | 3 | 45      |
| Emulsifier                              | HLB           | Failure of emulsifica-<br>tion process    | Stability, organoleptic<br>properties                                   | 5 | 5 | 2 | 50      |

|                             | CPPss                 | Potential failure mode                                          | Potential failure effects                                         | O | S | D | RP N |
|-----------------------------|-----------------------|-----------------------------------------------------------------|-------------------------------------------------------------------|---|---|---|------|
|                             | Melting point         | Great difference melting point comparative to other ingredients | Viscosity, texture parameters                                     | 4 | 4 | 1 | 16   |
|                             | Concentration         | Inappropriate concentrations                                    | Viscosity, texture parameters                                     | 5 | 5 | 3 | 75   |
|                             | Compatibility         | Incompatibility with other ingredients                          | Stability, organoleptic properties, viscosity, texture parameters | 3 | 5 | 3 | 45   |
| Co-emulsifier               | HLB                   | Incapacity of emulsification                                    | Stability, organoleptic properties                                | 5 | 5 | 2 | 50   |
|                             | Melting point         | Great difference melting point comparative to other ingredients | Stability, viscosity, texture parameters                          | 4 | 4 | 1 | 16   |
|                             | Concentration         | Improper concentration                                          | Viscosity, texture parameters                                     | 5 | 5 | 3 | 75   |
|                             | Compatibility         | Incompatibility with other ingredients                          | Stability, organoleptic properties, viscosity, texture parameters | 3 | 5 | 3 | 45   |
| Thickening agent            | Melting point         | Great difference melting point comparative to other ingredients | Stability, viscosity, texture parameters                          | 4 | 4 | 1 | 16   |
|                             | Concentration         | Inappropriate concentrations                                    | Viscosity, texture parameters                                     | 5 | 5 | 3 | 75   |
|                             | Compatibility         | Incompatibility with other ingredients                          | Stability, organoleptic properties, viscosity, texture parameters | 3 | 5 | 3 | 45   |
| Oily phase                  | Melting point         | Great difference melting point comparative to other ingredients | Stability, viscosity, texture parameters                          | 4 | 4 | 1 | 16   |
|                             | Concentration         | Inappropriate concentrations                                    | Viscosity, texture parameters                                     | 5 | 5 | 3 | 75   |
|                             | Compatibility         | Incompatibility with other ingredients                          | Stability, organoleptic properties, viscosity, texture parameters | 3 | 5 | 3 | 45   |
| Allantoin, urea, glycerine  | Concentration         | Inappropriate concentrations                                    | Efficiency                                                        | 2 | 3 | 3 | 18   |
|                             | Compatibility         | Incompatibility with other ingredients                          | Stability, organoleptic properties                                | 4 | 3 | 1 | 12   |
| Preservative                | Concentration         | Inappropriate concentrations                                    | Stability                                                         | 3 | 3 | 3 | 27   |
|                             | Compatibility         | Incompatibility with other ingredients                          | Stability, organoleptic properties                                | 3 | 3 | 1 | 9    |
| Critical process parameters |                       |                                                                 |                                                                   |   |   |   |      |
| Herbal extracts preparation | Method of extraction  | Improper extraction                                             | Efficiency                                                        | 3 | 3 | 5 | 45   |
|                             | Solvent concentration | Improper extraction                                             | Efficiency                                                        | 3 | 3 | 5 | 45   |
|                             | Extraction ratio      | Improper extrac-                                                | Efficiency                                                        | 3 | 3 | 5 | 45   |

|                      | CPPs                                             | Potential failure mode             | Potential failure effects                                                    | O | S | D | RPN |
|----------------------|--------------------------------------------------|------------------------------------|------------------------------------------------------------------------------|---|---|---|-----|
|                      | Time of extraction                               | Improper extraction                | Efficiency                                                                   | 3 | 3 | 5 | 45  |
|                      | Concentration technique                          | Improper concentration of extracts | Efficiency                                                                   | 3 | 3 | 5 | 45  |
|                      | % of herbal extract                              | Improper efficiency                | Efficiency                                                                   | 3 | 3 | 5 | 45  |
|                      | Temperature of the cream during extract addition | Inappropriate temperature          | Stability, organoleptic properties, viscosity, texture parameters, stability | 4 | 4 | 2 | 32  |
| Emulsion preparation | Order of mixing phases                           | Improper order                     | Stability, organoleptic properties, viscosity, texture parameters, stability | 4 | 4 | 2 | 32  |
|                      | Cooling regime                                   | Inappropriate temperature          | Stability, organoleptic properties, viscosity, texture parameters, stability | 4 | 4 | 2 | 32  |
|                      | Speed of addition of external phase              | Improper speed                     | Stability, organoleptic properties, viscosity, texture parameters, stability | 4 | 4 | 2 | 32  |
|                      | Homogenization- temperature                      | Inappropriate temperature          | Stability, organoleptic properties, viscosity, texture parameters, stability | 4 | 4 | 2 | 32  |
|                      | Homogenization-equipment                         | Improper equipment                 | Stability, organoleptic properties, viscosity, texture parameters, stability | 4 | 4 | 2 | 32  |
|                      | Stirring rate                                    | Improper stirring rate             | Stability, organoleptic properties, viscosity, texture parameters, stability | 4 | 4 | 2 | 32  |
|                      | Mixing time                                      | Inappropriate time                 | Stability, organoleptic properties, viscosity, texture parameters, stability | 4 | 4 | 2 | 32  |

CPPs – Critical Process Parameters; O – occurrence; S – severity; D – detectability; RPN – risk priority number;



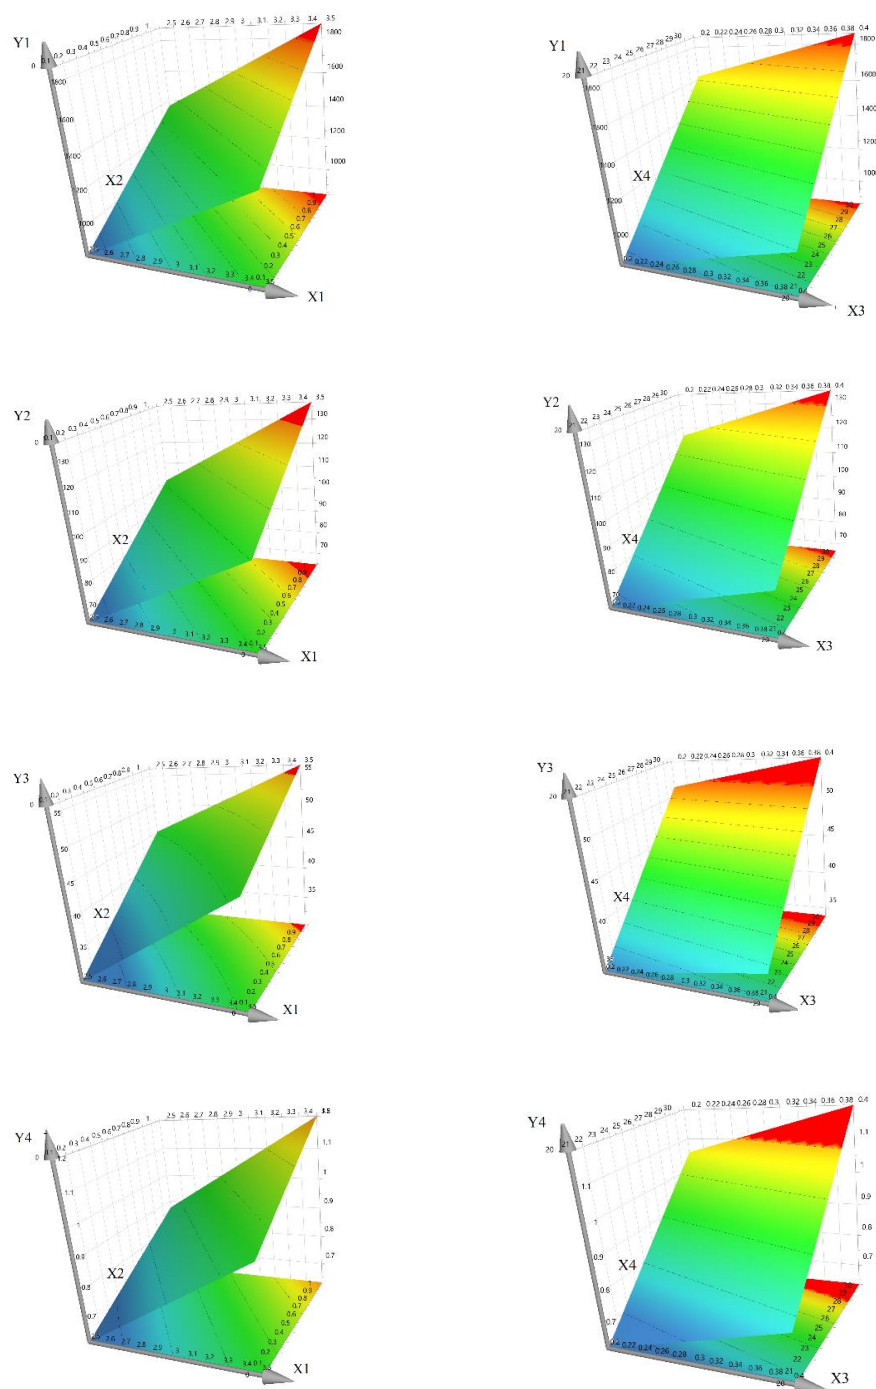

**Figure S24.** Response surface plots (X1- emulsifier ratio, X2- co-emulsifier ratio, X3 -thickening agent ratio, and X4 - oily phase ratio; Y1 - firmness; Y2 – consistency; Y3 - adhesiveness; Y4 -stringiness; Y5 - spreadability; Y6- viscosity)

**Table S2.** LC/MS mobile-phase gradient composition

| Time, min | Methanol | Water | 2 % formic acid in water |
|-----------|----------|-------|--------------------------|
| 0.00      | 5        | 90    | 5                        |
| 3.00      | 15       | 70    | 15                       |
| 6.00      | 15       | 70    | 15                       |

---

|       |    |    |    |
|-------|----|----|----|
| 9.00  | 21 | 58 | 21 |
| 13.00 | 21 | 58 | 21 |
| 18.00 | 30 | 41 | 29 |
| 22.00 | 30 | 41 | 29 |
| 26.00 | 50 | 0  | 50 |
| 29.00 | 50 | 0  | 50 |
| 29.01 | 5  | 90 | 5  |
| 35.00 | 5  | 90 | 5  |
